# Supplementary material
Source: PubMed Central journal article supplement (PMC2504083)
Supplement: NIHMS58996-supplement-1.pdf [file NIHMS58996-supplement-1.pdf]

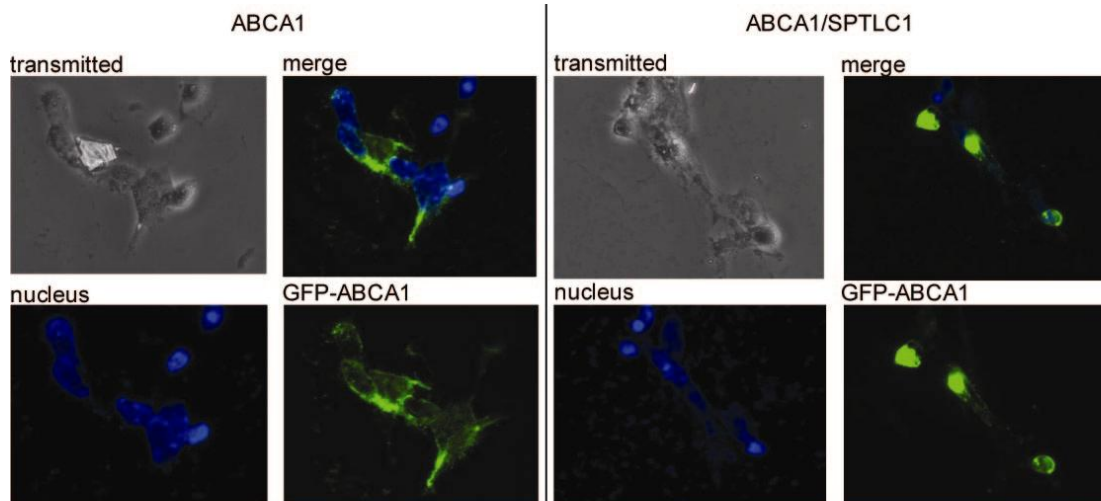

Supplementary Figure 1. **SPTLC1 expression induces a relocalization of ABCA1 to a peri-nuclear distribution.** 293 cells transfected with GFP-ABCA1 and counter stained with the nuclear DAPI dye show a largely cell surface distribution of ABCA1 (left panels) while GFP-ABCA1 localizes to a more peri-nuclear position in cells co-transfected with SPTLC1 (right panels).

SPTLC1 negatively regulates ABCA1 efflux activity

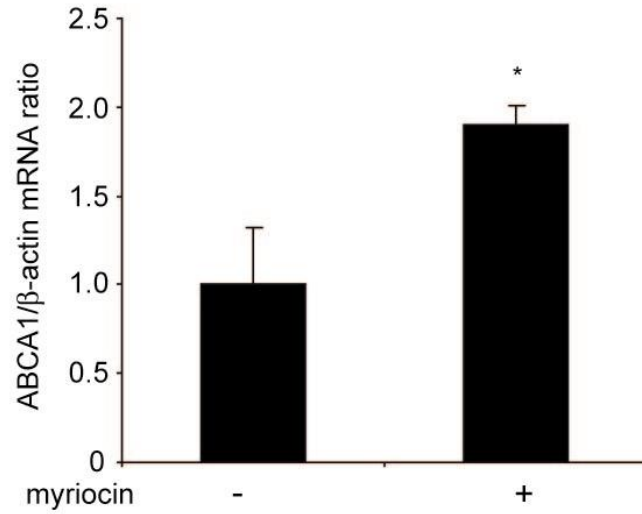

Supplementary Figure 2. Myriocin stimulates ABCA1 message. Bone marrow derived macrophage were treated with myriocin (10 uM) or vehicle (DMSO) for 24 h and ABCA1 message levels were determined by RT-QPCR. The ABCA1/β-actin mRNA ratio is shown (n=3 + SD, \*p=0.01)

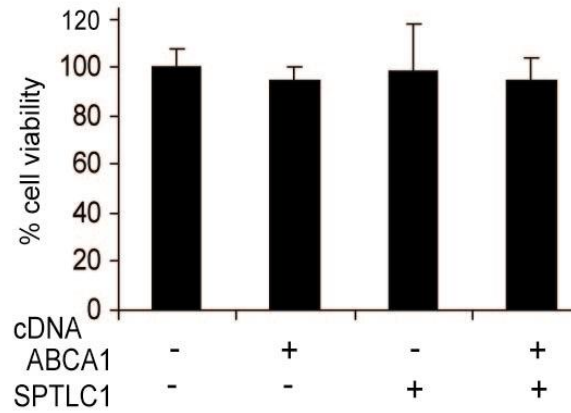

Supplementary Figure 3 **SPTLC1 expression does not induce cell toxicity.**

293ET cells were transfected with the indicated cDNAs or with an equivalent amount of empty vector. 24 h post transfection cell viability was measured by the MTT enzymatic assay. Cell viability is expressed relative to empty vector control (n=4 + SD).
